# Supplementary material for: Role of IL13RA2 in Sunitinib Resistance in Clear Cell Renal Cell Carcinoma
Source: PubMed Central journal article supplement (PMC4482605; doi:10.1371/journal.pone.0130980), 2015-06-26

S2 Fig.

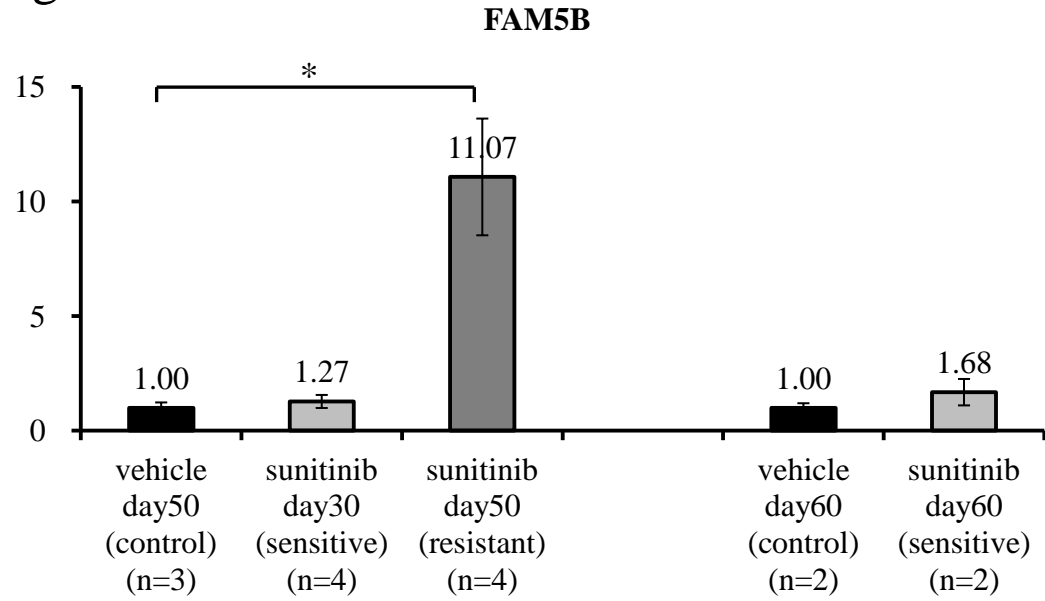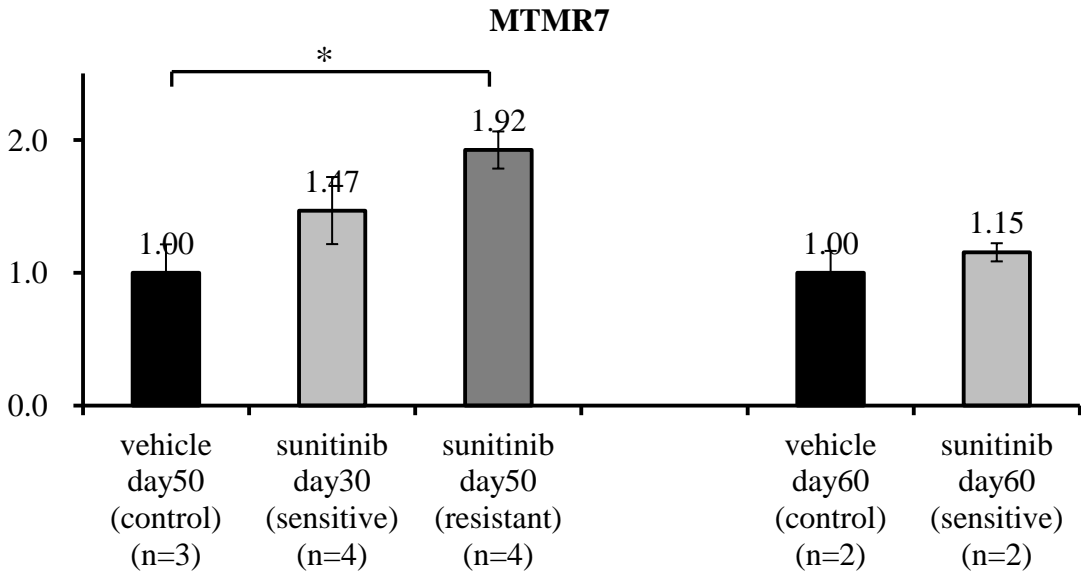

Supplement: pone.0130980.s002.pdf [file pone.0130980.s002.pdf]
