# Supplementary material for: Role of IL13RA2 in Sunitinib Resistance in Clear Cell Renal Cell Carcinoma
Source: PubMed Central journal article supplement (PMC4482605; doi:10.1371/journal.pone.0130980), 2015-06-26

# S4 Fig.

## A

IL13RA2  
staining

786-O

Mock

IL13RA2

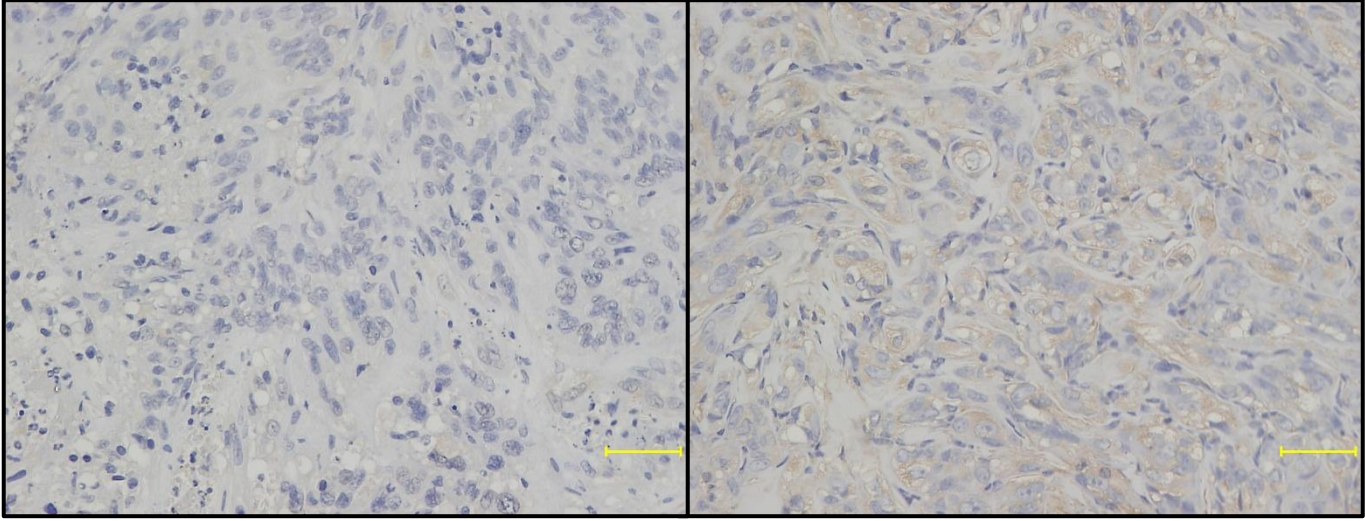

## B

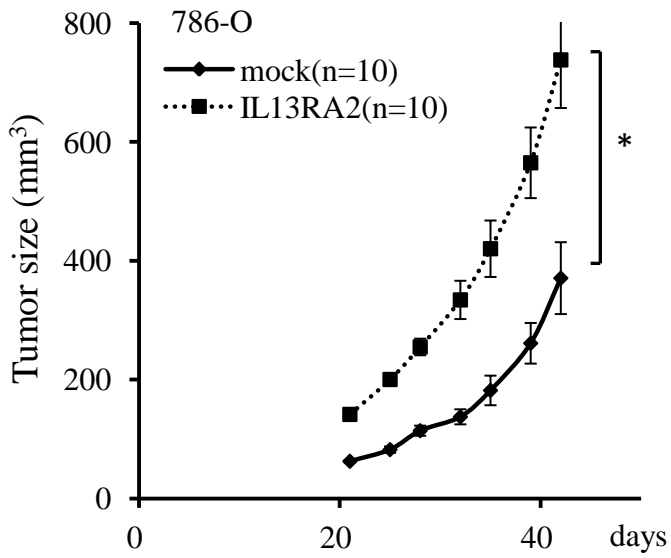

Supplement: pone.0130980.s004.pdf [file pone.0130980.s004.pdf]
