# Supplementary material for: Role of IL13RA2 in Sunitinib Resistance in Clear Cell Renal Cell Carcinoma
Source: PubMed Central journal article supplement (PMC4482605; doi:10.1371/journal.pone.0130980), 2015-06-26

# S5 Fig.

## A

IL13RA2  
staining

Caki-1

sh-scrambled

sh-IL13RA2

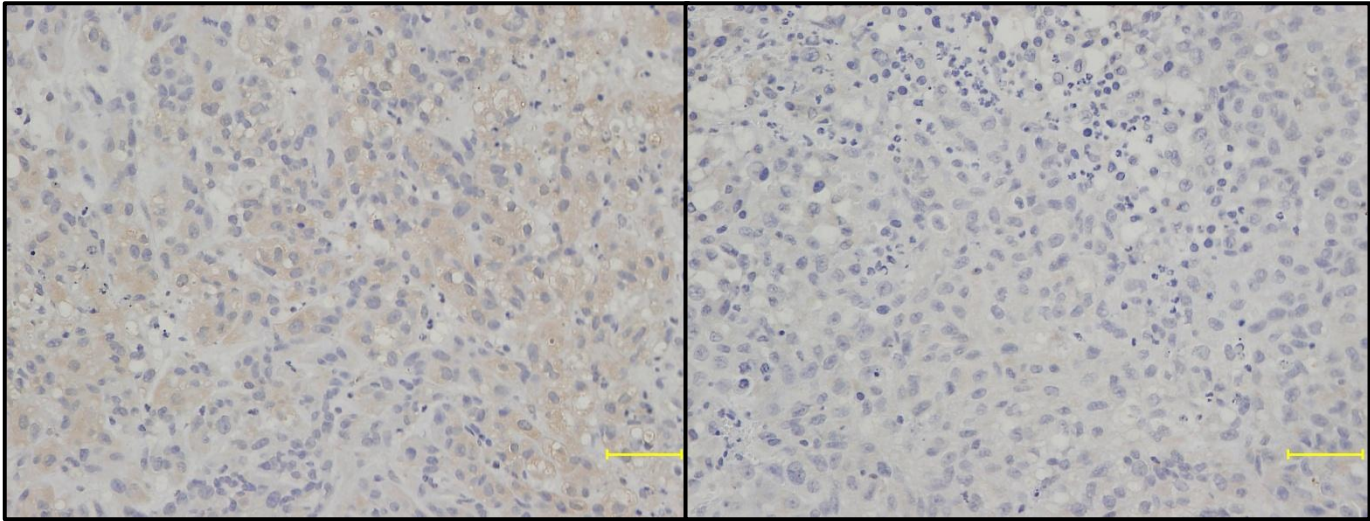

## B

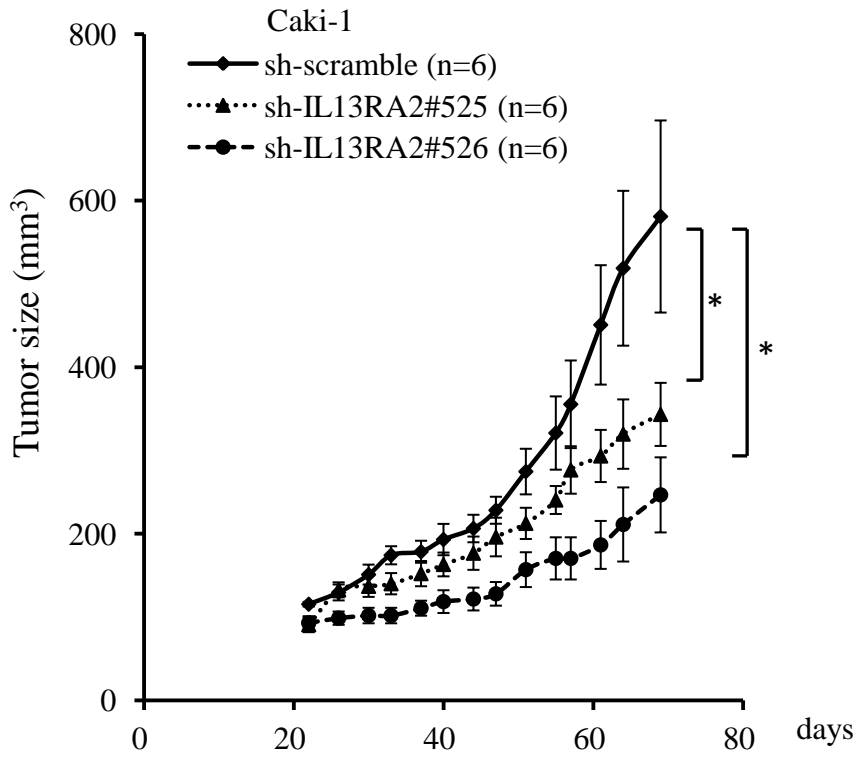

Supplement: pone.0130980.s005.pdf [file pone.0130980.s005.pdf]
