# Supplementary material for: Role of IL13RA2 in Sunitinib Resistance in Clear Cell Renal Cell Carcinoma
Source: PubMed Central journal article supplement (PMC4482605; doi:10.1371/journal.pone.0130980), 2015-06-26

# S6 Fig.

## A

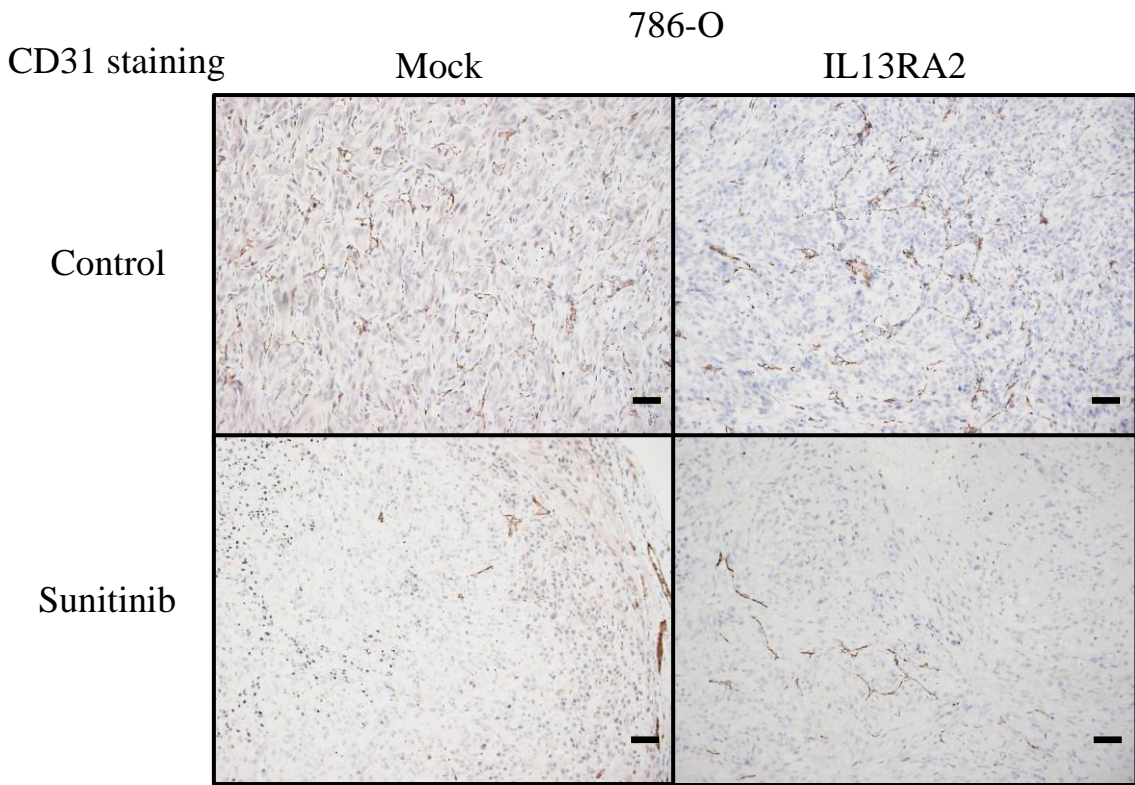

## B

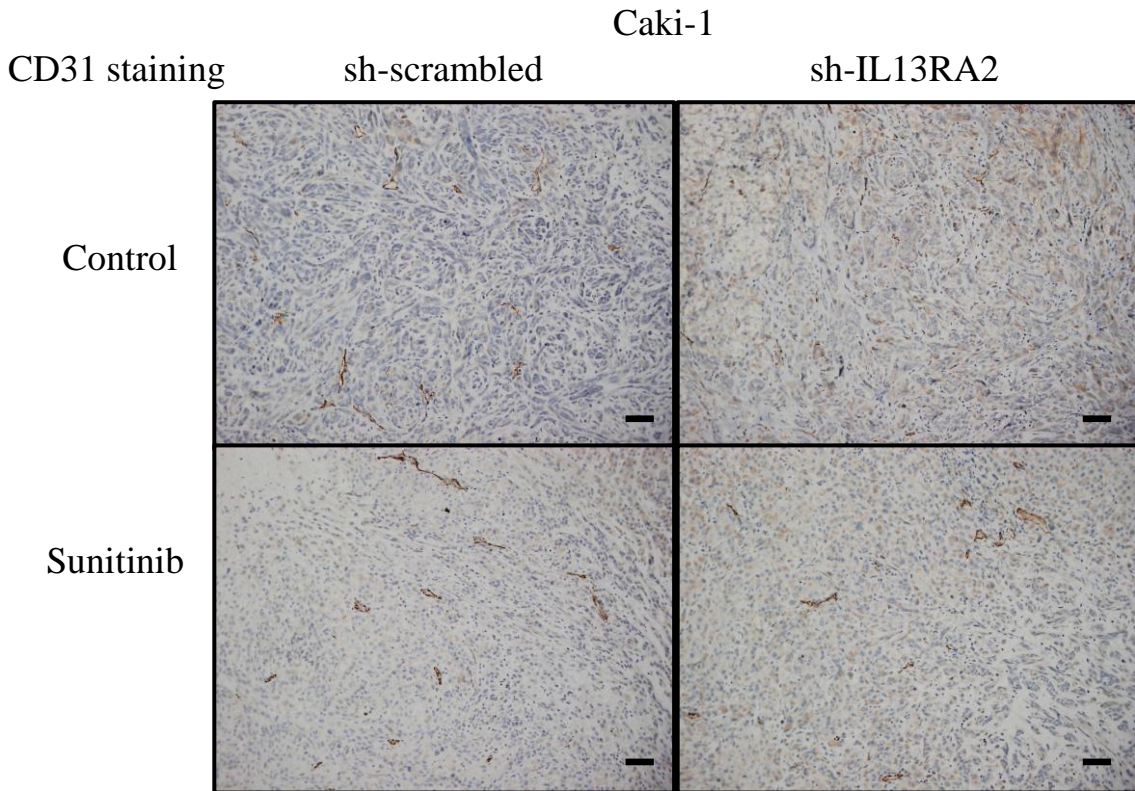

Supplement: pone.0130980.s006.pdf [file pone.0130980.s006.pdf]
