# Supplementary material for: Role of IL13RA2 in Sunitinib Resistance in Clear Cell Renal Cell Carcinoma
Source: PubMed Central journal article supplement (PMC4482605; doi:10.1371/journal.pone.0130980), 2015-06-26

S8 Fig.

**IL13RA2 mRNA expression in clear cell renal cell carcinoma reported by Vasselli**

**Grade 3 versus Grade 4**

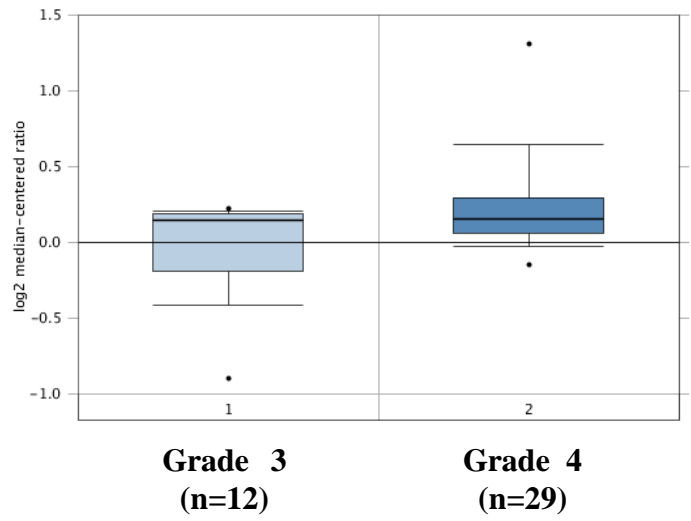

**Alive at 1 year versus dead at 1 year**

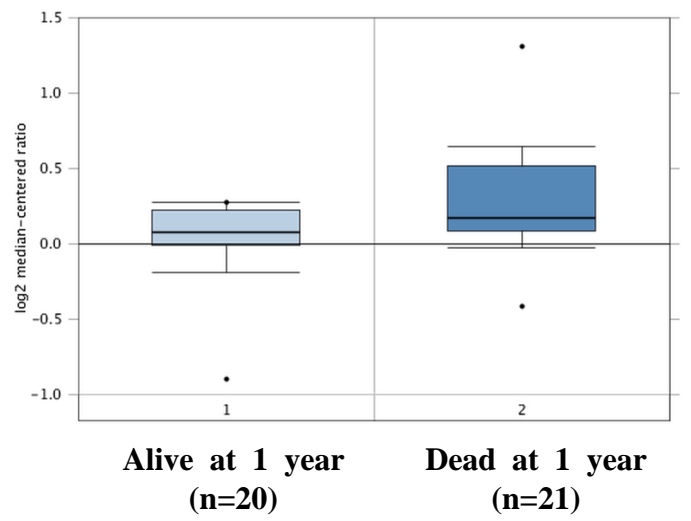

*P*=0.011

*P*=0.015

**IL13RA2 mRNA expression in clear cell renal cell carcinoma reported by Bittner**  
**Grade 1 ~ 4**

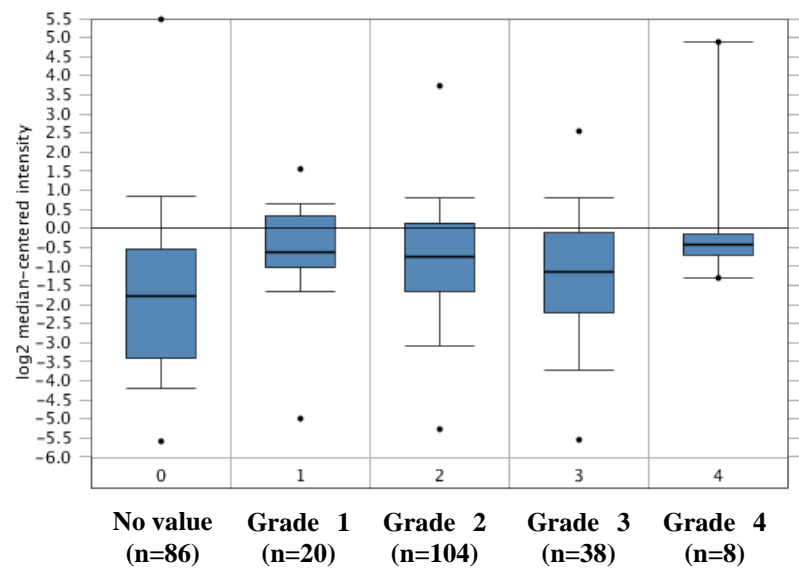

Supplement: pone.0130980.s008.pdf [file pone.0130980.s008.pdf]
